# Supplementary material for: Comprehensive Draft Genome Analyses of Three Rockfishes (Scorpaeniformes, Sebastiscus) via Genome Survey Sequencing
Source: MDPI journal article supplement (doi:10.3390/cimb43030141), 2021-11-18
Supplement: s1 [file s1]

**Table S1** Base composition of *Sebastiscus* mitochondrial genomes.

|          | <i>S. albofasciatus</i> |       |       |       |       | <i>S. tertius</i> |       |       |       |       | <i>S. marmoratus</i> |       |       |       |       |
|----------|-------------------------|-------|-------|-------|-------|-------------------|-------|-------|-------|-------|----------------------|-------|-------|-------|-------|
|          | A                       | T     | G     | C     | A+T   | A                 | T     | G     | C     | A+T   | A                    | T     | G     | C     | A+T   |
| Whole    | 28.15                   | 26.59 | 17.00 | 28.26 | 54.73 | 28.21             | 26.48 | 16.76 | 28.55 | 54.69 | 28.48                | 26.49 | 16.64 | 28.39 | 54.97 |
| 12S rRNA | 29.81                   | 19.87 | 22.62 | 27.70 | 49.68 | 29.67             | 19.96 | 22.70 | 27.67 | 49.63 | 30.02                | 19.77 | 22.41 | 27.80 | 49.79 |
| 16S rRNA | 32.62                   | 21.16 | 20.98 | 25.24 | 53.78 | 32.45             | 21.22 | 21.16 | 25.18 | 53.66 | 32.74                | 20.98 | 20.86 | 25.41 | 53.72 |
| COI      | 24.95                   | 30.37 | 17.86 | 26.82 | 55.32 | 24.63             | 30.37 | 18.12 | 26.89 | 55.00 | 25.02                | 30.63 | 17.79 | 26.56 | 55.64 |
| COII     | 28.94                   | 28.22 | 16.35 | 26.48 | 57.16 | 28.80             | 28.08 | 16.50 | 26.63 | 56.87 | 28.36                | 28.36 | 16.79 | 26.48 | 56.73 |
| COIII    | 25.10                   | 27.39 | 17.32 | 30.19 | 52.48 | 25.61             | 27.77 | 17.07 | 29.55 | 53.38 | 25.48                | 27.64 | 16.94 | 29.94 | 53.12 |
| ATPase 6 | 26.94                   | 29.72 | 13.32 | 30.01 | 56.66 | 26.94             | 29.72 | 13.62 | 29.72 | 56.66 | 27.09                | 29.14 | 13.03 | 30.75 | 56.22 |
| ATPase 8 | 28.57                   | 23.21 | 13.69 | 34.52 | 51.79 | 29.17             | 23.21 | 13.10 | 34.52 | 52.38 | 29.17                | 22.02 | 13.10 | 35.71 | 51.19 |
| ND1      | 24.82                   | 27.90 | 15.49 | 31.79 | 52.72 | 24.72             | 27.28 | 15.28 | 32.72 | 52.00 | 24.82                | 27.59 | 15.49 | 32.10 | 52.41 |
| ND2      | 27.25                   | 26.20 | 12.62 | 33.94 | 53.44 | 27.34             | 26.48 | 12.43 | 33.75 | 53.82 | 26.77                | 26.77 | 13.10 | 33.37 | 53.54 |
| ND3      | 22.06                   | 32.66 | 15.76 | 29.51 | 54.73 | 21.78             | 32.66 | 15.76 | 29.80 | 54.44 | 21.78                | 32.95 | 16.05 | 29.23 | 54.73 |
| ND4L     | 21.89                   | 28.28 | 16.84 | 33.00 | 50.17 | 20.88             | 28.28 | 17.17 | 33.67 | 49.16 | 22.22                | 27.61 | 16.50 | 33.67 | 49.83 |
| ND4      | 26.21                   | 28.60 | 15.06 | 30.12 | 54.82 | 25.92             | 28.31 | 15.35 | 30.41 | 54.24 | 26.36                | 27.66 | 14.84 | 31.14 | 54.02 |
| ND5      | 27.95                   | 27.24 | 14.46 | 30.34 | 55.19 | 27.95             | 26.75 | 14.25 | 31.05 | 54.70 | 28.28                | 27.08 | 14.25 | 30.40 | 55.36 |
| ND6      | 14.56                   | 36.78 | 33.52 | 15.13 | 51.34 | 14.37             | 37.55 | 34.10 | 13.98 | 51.92 | 14.75                | 38.51 | 33.33 | 13.41 | 53.26 |
| Cyt b    | 24.89                   | 30.06 | 15.43 | 29.62 | 54.95 | 25.24             | 30.15 | 15.34 | 29.27 | 55.39 | 24.80                | 30.85 | 15.43 | 28.92 | 55.65 |
